# Supplementary material for: Accumulation of acetaldehyde in aldh2.1−/− zebrafish causes increased retinal angiogenesis and impaired glucose metabolism
Source: PubMed Central journal article supplement (PMC8818574; doi:10.1016/j.redox.2022.102249), 2022-01-26
Supplement: mmc1.pdf [file mmc1.pdf]

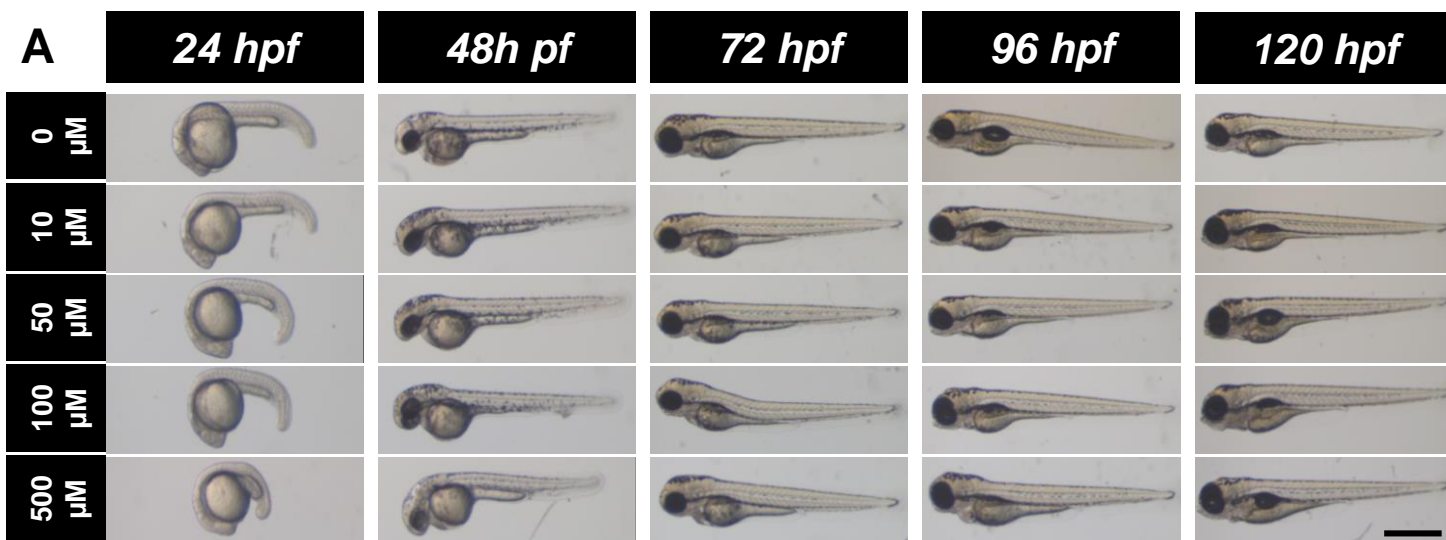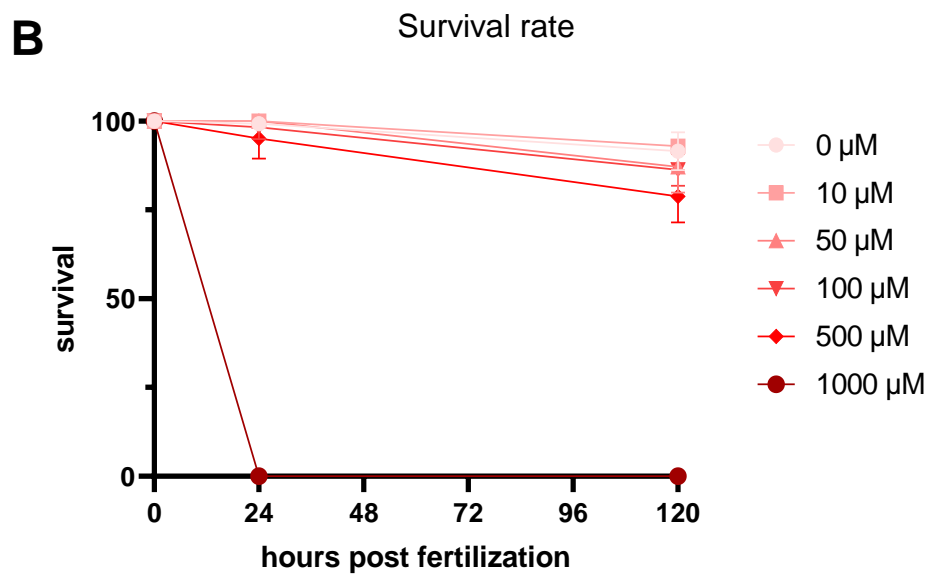

**Figure S1. Zebrafish larvae displayed no morphological alterations at 120 hpf after incubation with up to 500  $\mu\text{M}$  AA. A:** Representative microscopic images of zebrafish larvae between 24 hpf and 120 hpf displayed normal development up to 500  $\mu\text{M}$  AA treatment. Black scale bar: 500  $\mu\text{m}$ . **B:** Quantification of survival rates showed high lethality of 1000  $\mu\text{M}$  AA treated larvae.



**A**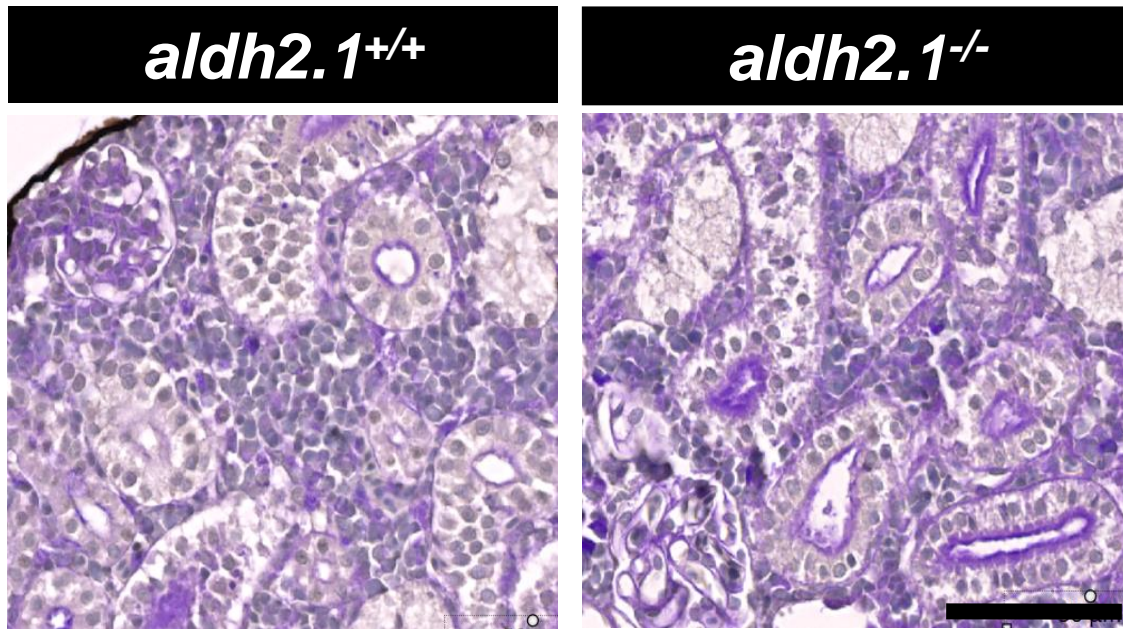**B**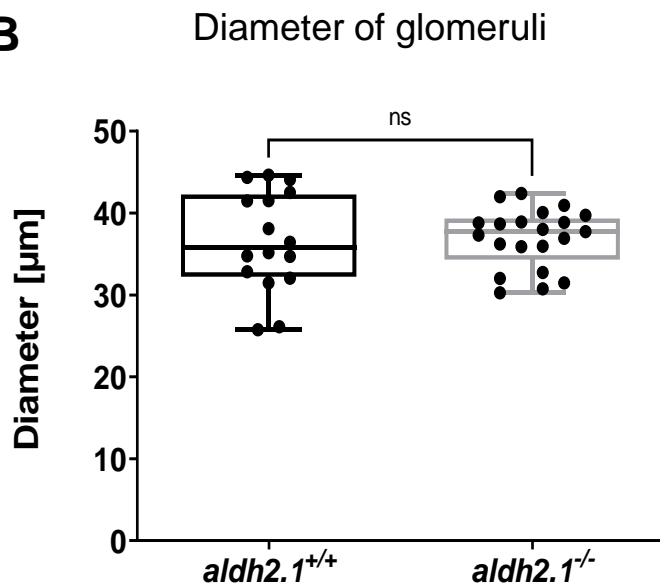

**Figure S3. Unaltered renal morphology in adult *aldh2.1*<sup>-/-</sup> zebrafish.** **A:** Representative Periodic acid-Schiff (PAS) staining showed no alterations in gross morphology of *aldh2.1*<sup>-/-</sup> kidneys. Black scale bar: 50  $\mu\text{m}$ . **B:** Quantification of glomerular diameter in zebrafish kidneys showed no changes between *aldh2.1*<sup>+/+</sup> and *aldh2.1*<sup>-/-</sup> zebrafish. Statistical analysis was done via Student's t-test, ns = not significant.

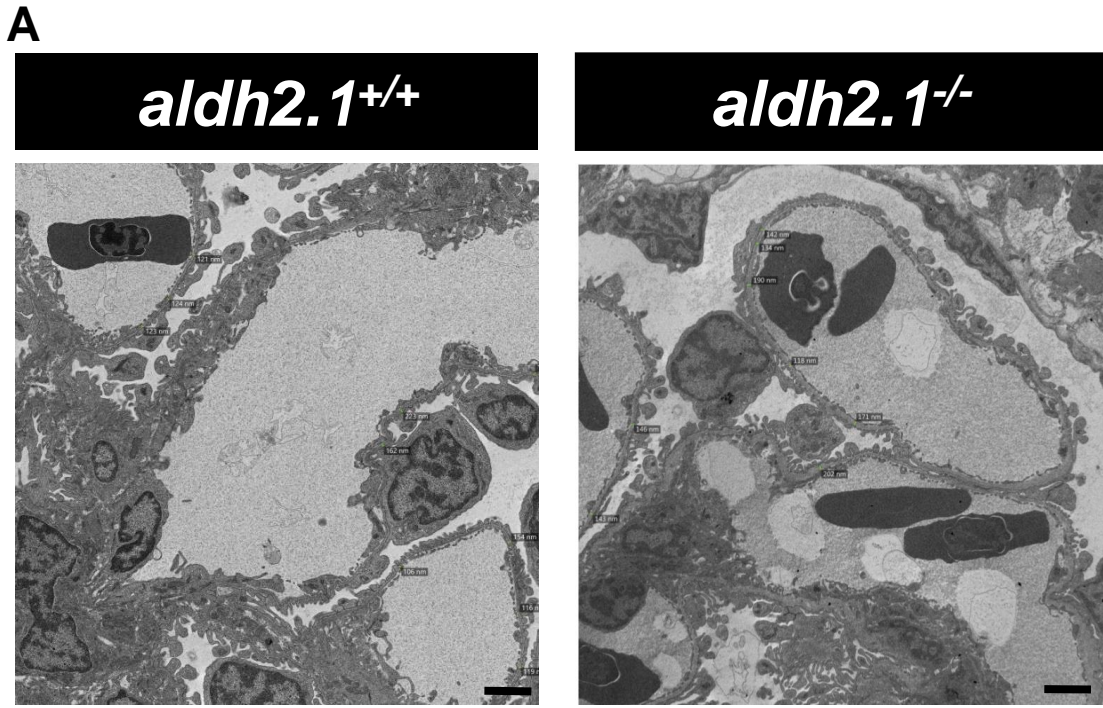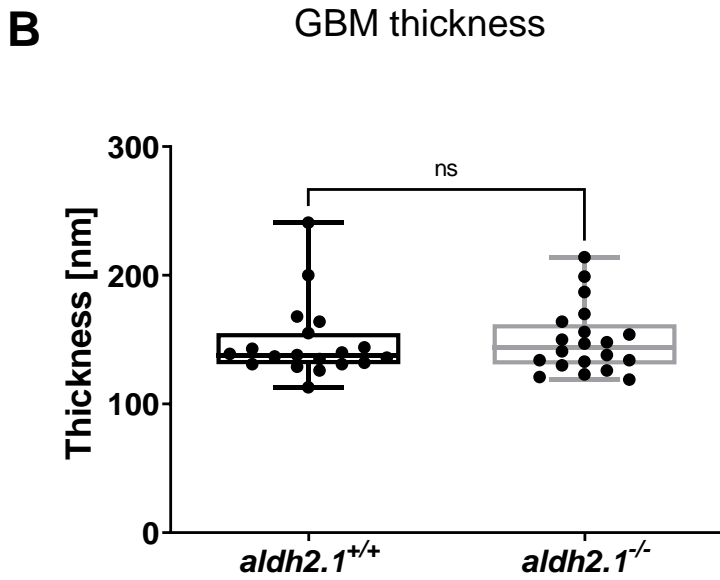

**Figure S4. Unaltered glomerular morphology in adult *aldh2.1<sup>-/-</sup>* zebrafish.** **A:** Representative electronmicroscopy images showed no alterations in *aldh2.1<sup>-/-</sup>* glomeruli. Black scale bar: 2  $\mu$ m. **B:** Quantification of GBM thickness in *aldh2.1<sup>-/-</sup>* zebrafish glomeruli showed no changes. Statistical analysis was done via Student's t-test, ns = not significant.

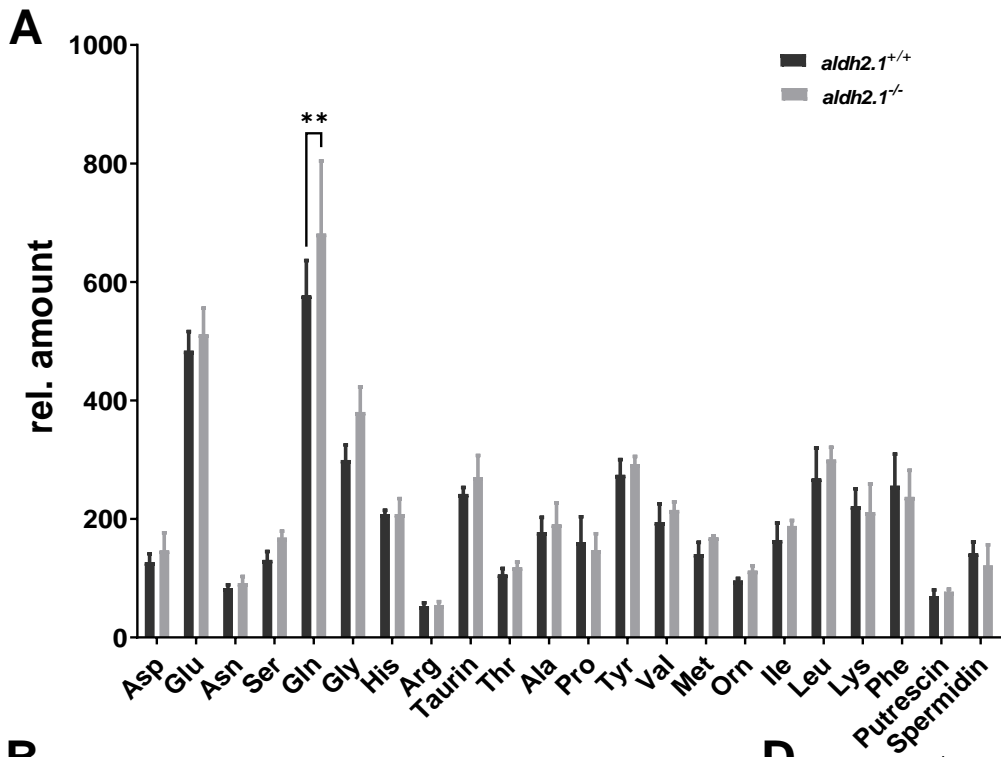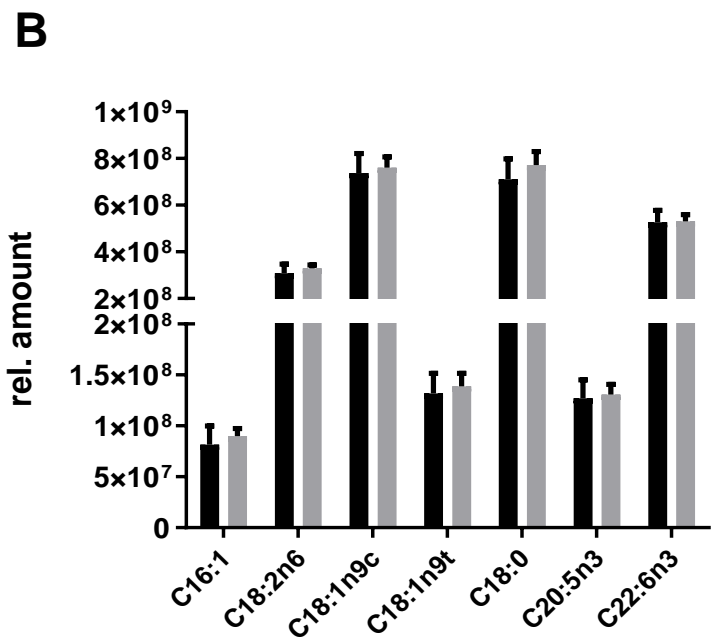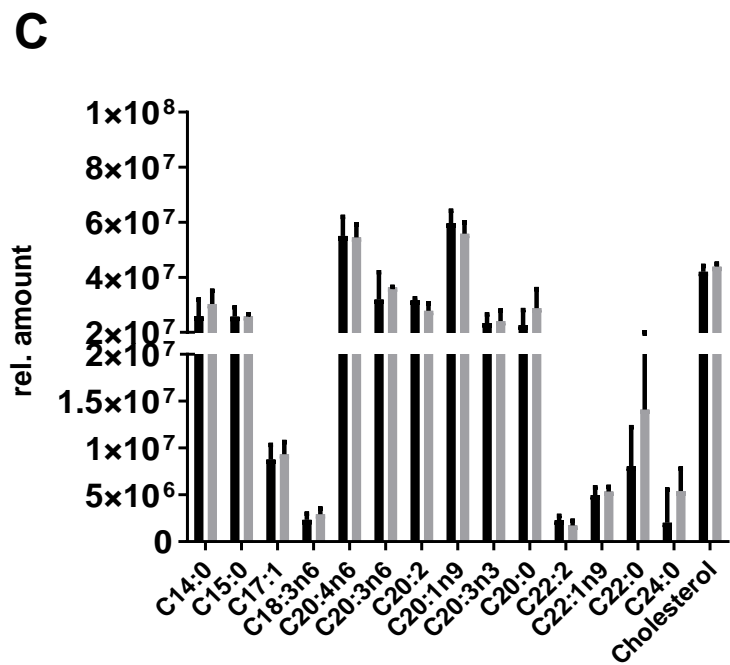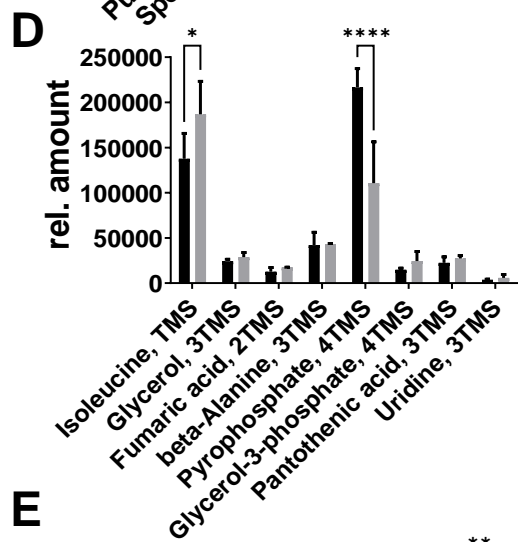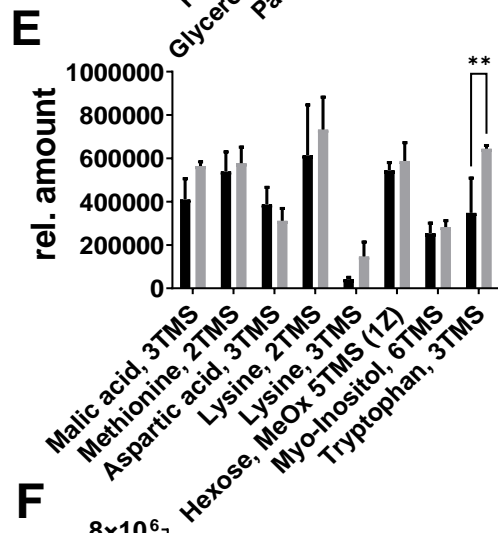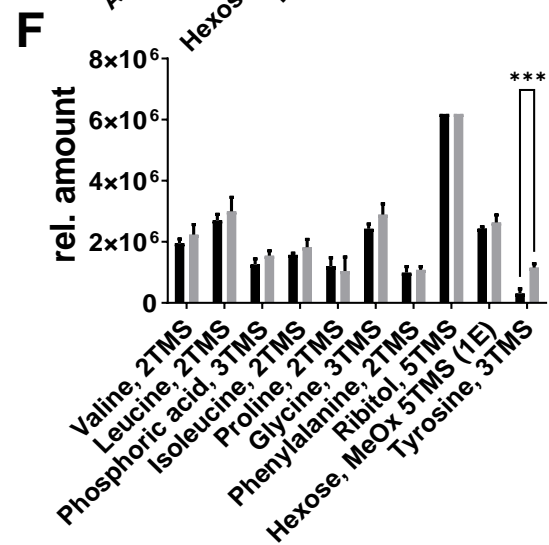

**Figure S5. Metabolomic screening showed minor alterations between *aldh2.1<sup>+/+</sup>* and *aldh2.1<sup>-/-</sup>* zebrafish larvae at 96 hpf. A:** Quantification of amino acids displayed a significant increase in glutamine concentrations of *aldh2.1<sup>-/-</sup>* larvae. **B,C:** Quantification of fatty acids in 96 hpf larvae showed no change between *aldh2.1<sup>+/+</sup>* and *aldh2.1<sup>-/-</sup>* larvae. **D,E,F:** Semi-Targeted Screening identified an increase in aromatic amino acids: tryptophan and tyrosine and a decrease of pyrophosphates in *aldh2.1<sup>-/-</sup>* larvae. Statistical analysis was done via Student's t-test, ns = not significant, \*p < 0.05, \*\*p < 0.01, \*\*\*p < 0.001, \*\*\*\*p < 0.0001.

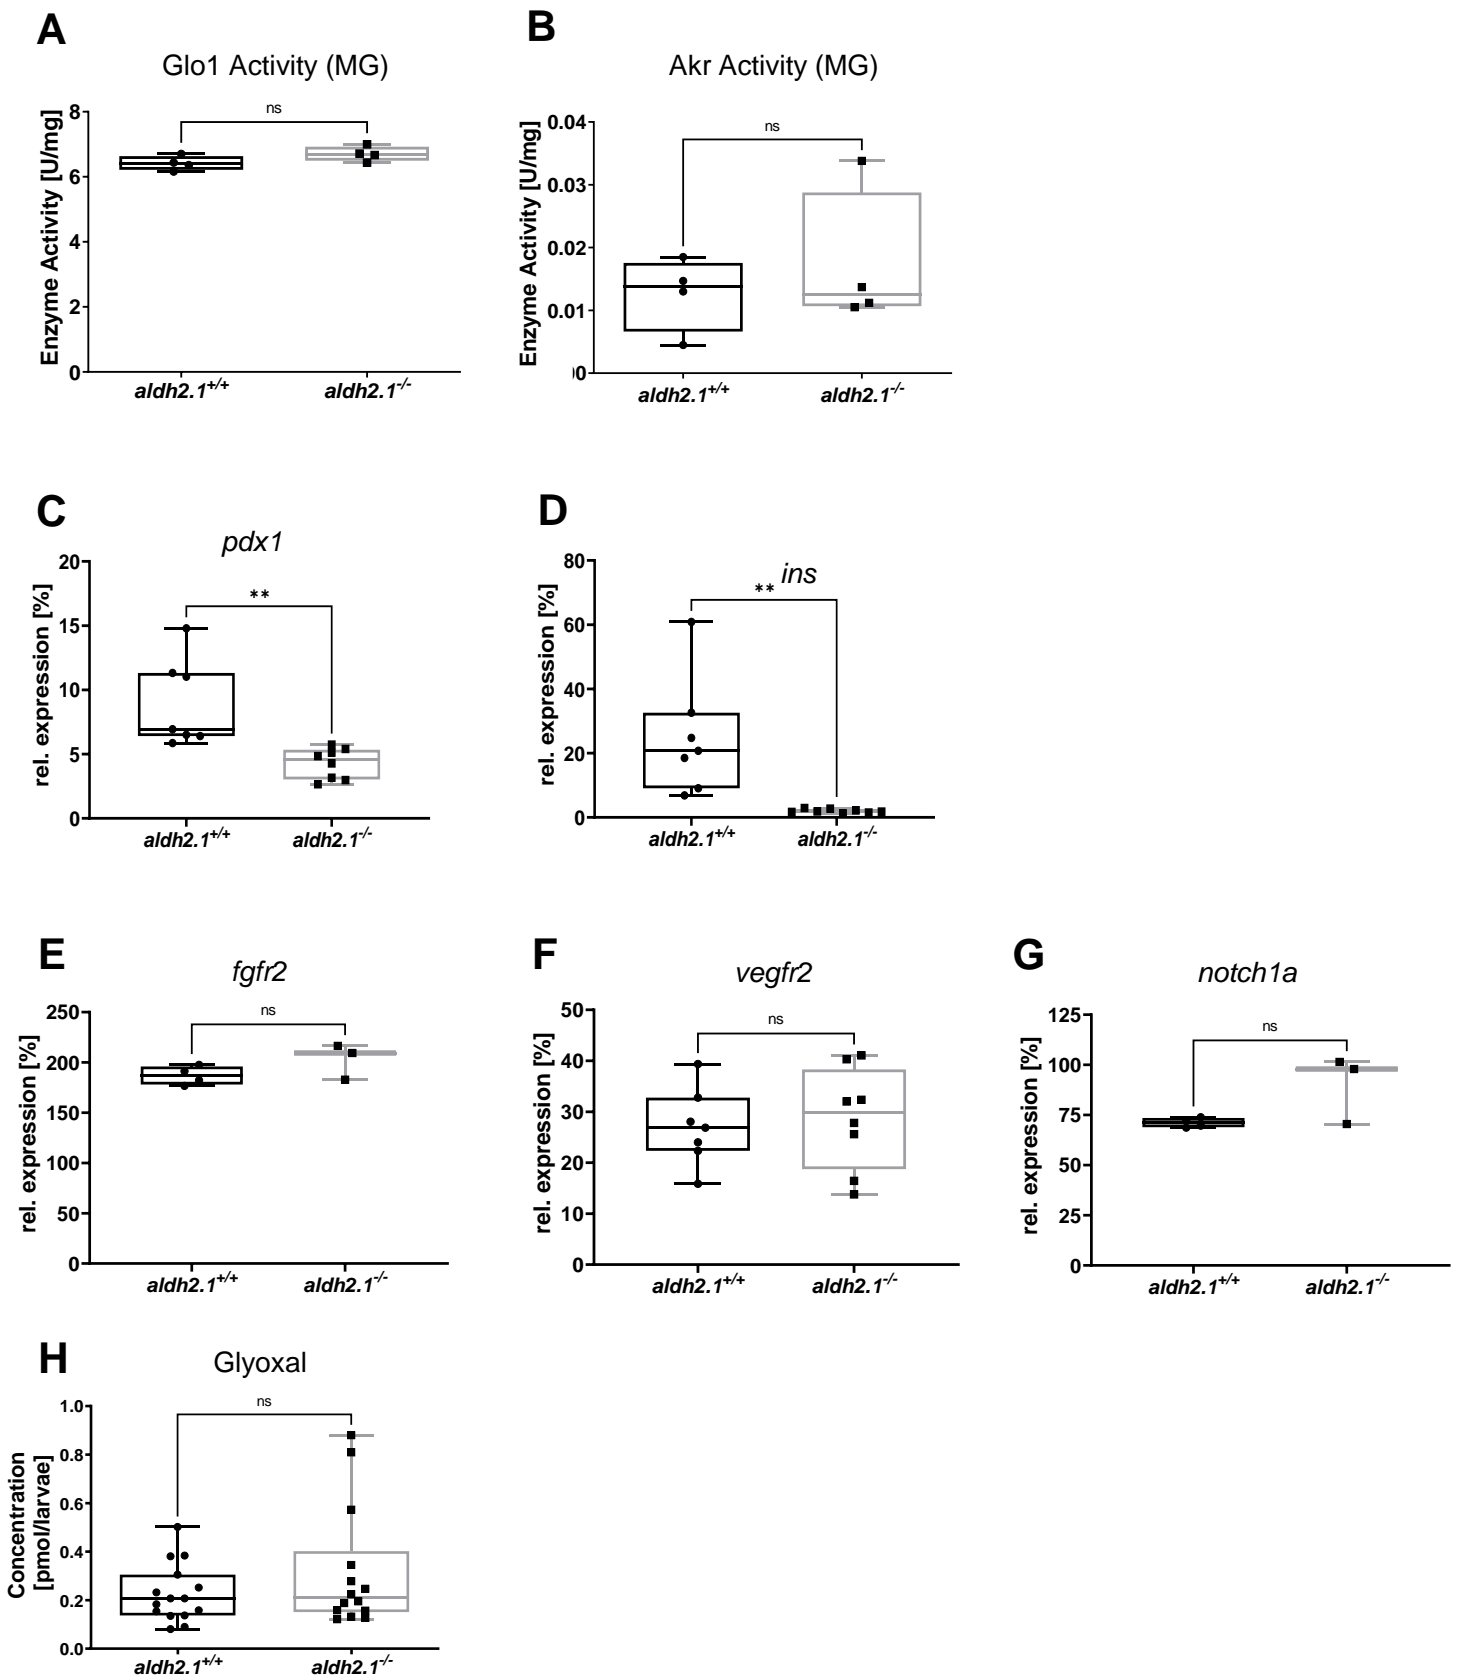

**Figure S6.** *aldh2.1*<sup>-/-</sup> larvae displayed decreased *pdx1* and *ins* expression, but unaltered expression of angiogenesis related factors. **A,B:** Quantification of enzyme activity for Glo1 and Akh showed no change in *aldh2.1*<sup>-/-</sup> zebrafish larvae. **C,D:** Strongly reduced *pdx1* and *ins* expression in *aldh2.1*<sup>-/-</sup> larvae. **E,F,G:** Quantification of gene expression of angiogenesis related factors: *fgfr2* (**E**), *vegfr2* (**F**) and *notch1a* (**G**) showed no change in *aldh2.1*<sup>-/-</sup> larvae compared to *aldh2.1*<sup>+/+</sup> larvae. Expression was quantified via RT-qPCR with 96 hpf zebrafish larvae and normalized to *arnt2*, n = 5-8 clutches, 50 larvae per clutch. Quantification of glyoxal in 96 hpf larvae (**H**) showed no difference between *aldh2.1*<sup>+/+</sup> and *aldh2.1*<sup>-/-</sup> zebrafish, n = 14, 50 larvae per clutch. Statistical analysis was done via Student's t-test, ns = not significant, \*p < 0.05, \*\*p < 0.01, \*\*\*p < 0.001, \*\*\*\*p < 0.0001.

| <b>Name</b>                                | <b>NES</b> | <b>pvalue</b> |
|--------------------------------------------|------------|---------------|
| Pantothenate_and_CoA_biosynthesis          | -2,44      | 0,0002        |
| Histidine_metabolism                       | -2,26      | 0,0006        |
| Beta-Alanine_metabolism                    | -2,16      | 0,0007        |
| Glycerolipid_metabolism                    | -2,1       | 0,0002        |
| Ribosome                                   | -2,08      | 0,0002        |
| Pyruvate_metabolism                        | -2,03      | 0,0007        |
| Valine,_leucine_and_isoleucine_degradation | -2         | 0,0009        |
| Tryptophan_metabolism                      | -2         | 0,0004        |
| Arginine_and_proline_metabolism            | -1,99      | 0,0007        |
| Lysine_degradation                         | -1,97      | 0,0007        |
| Fatty_acid_degradation                     | -1,89      | 0,0018        |
| Ascorbate_and_aldarate_metabolism          | -1,87      | 0,0039        |
| Glycolysis_Gluconeogenesis                 | -1,82      | 0,0015        |
| VEGF_signaling_pathway                     | 1,46       | 0,0245        |
| Endocytosis                                | 1,53       | 0,0003        |
| Apoptosis                                  | 1,53       | 0,0028        |
| MAPK_Signaling_Pathway                     | 1,58       | 0,0003        |
| Cardiac_muscle_contraction                 | 1,58       | 0,0027        |
| Cellular_senescence                        | 1,6        | 0,0011        |
| Ferroptosis                                | 1,66       | 0,0066        |
| Regulation_of_actin_cytoskeleton           | 1,73       | 0,0002        |
| Tight_junction                             | 1,88       | 0,0002        |
| Focal_adhesion                             | 1,99       | 0,0002        |
| ECM-receptor_interaction                   | 2,04       | 0,0002        |

**Table S1. RNA-seq KEGG-Analysis values corresponding to Fig.4**



| <b>CRISPR-construct name</b>  | <b>Primer sequence (5' to 3')</b> |
|-------------------------------|-----------------------------------|
| Aldh2.1-CRISPR-for            | TAGGGCTCTCCCTGGCGCCGCA            |
| Aldh2.1-CRISPR-rev            | AAACTGCGGCGCCAGGGAGAGC            |
|                               |                                   |
| <b>Genotyping primer name</b> | <b>Primer sequence (5' to 3')</b> |
| Aldh2.1- gt 2.1 fw1           | CCCTGCTGTGCAGTGTATTG              |
| Aldh2.1- gt 2.3 fw2           | CTGGCATGGCAATAAACACA              |
| Aldh2.1- gt 2.4 rv2           | TGCATCGAGAGAGATGCTGCCT            |
| <b>qPCR primer name</b>       | <b>Primer sequence (5' to 3')</b> |
| aldh2.1-qPCR-left             | CGCACTGTATATCGCCAGTTTA            |
| aldh2.1-qPCR-right            | GGACCAAACCCTGGGATAAT              |

**Table S2. CRISPR constructs, primers for genotyping and qPCR for zebrafish *aldh2.1***

| qPCR primer name | Primer sequence (5' to 3') | qPCR primer name   | Primer sequence (5' to 3') |
|------------------|----------------------------|--------------------|----------------------------|
| qPCR mapk3 fw2   | GCTCCTGAGAGGGACAGTCATC     | G6Pase_qPCR_Left   | TCACAGCGTTGCTTTCAATC       |
| qPCR mapk3 rv2   | TCGCAGGTCGTCTGGAGTTTT      | G6Pase_qPCR_Right  | AACCCAGAAACATCCACAGC       |
| qPCR mapk7 fw2   | CTGGATCGGCCTTGTCGGT        | G6PDH_qPCR_Left    | CGTCTTTTGTGGCAGTCAGA       |
| qPCR mapk7 rv2   | GATCAATGGTTTCCGGCTGGC      | G6PDH_qPCR_Right   | TGATGGGTGGTGTTTTCTCA       |
| qPCR mapk8 fw1   | CCGGCCTCGCTAGCACA          | cPEPCK_qPCR_Left   | ATCACGCATCGCTAAAGAGG       |
| qPCR mapk8 rv1   | ACCTCGGTGGACATGGACGA       | cPEPCK_qPCR_Right  | CCGCTGCGAAATACTTCTTC       |
| qPCR mapk11 fw1  | GCTTCTTCGGGGCCTTAAGTACA    | hk1_qPCR_Left      | ATGATAGCGGCACAGCTTCT       |
| qPCR mapk11 rv1  | CATTCACGGCTACATTGCTTGGC    | hk1_qPCR_Right     | GTGGGTGCTCGTGCCAATC        |
| qPCR mapk12a fw2 | ACCAAATGTTAACCCGCAAGCGAT   | hk2_qPCR_Left      | TGAGGTCAGTCTCGTCCAGT       |
| qPCR mapk12a rv2 | CCTCTGCTGCTGTTATCCGGC      | hk2_qPCR_Right     | TCTTAATCGACAGGCCACCG       |
| qPCR mapk14b fw1 | TCCCGGCACAGATCACATTG       | gck_qPCR_Left      | AATCACCGCTGACCTGCTAT       |
| qPCR mapk14b rv1 | TTTTCATCAAGAGCTCAGGCC      | gck_qPCR_Right     | GCCACTTCACATACGCAATG       |
| b2m_qPCR_Left    | ACTGCTGAAGAACGGACAGG       | glo1-qPCR-for      | AGCAGACAATGCTGCGGGTG       |
| b2m_qPCR_Right   | GCAACGCTCTTTGTGAGGTG       | glo1-qPCR-rev      | CTACGGGAGAACGTCCAGGC       |
| arnt2_qPCR_Left  | AGCCAGACAGAGGTCTTCCA       | 2-INS_qPCR_Left    | GGTCGTGTCCAGTGTAAGCA       |
| arnt2_qPCR_Right | CCGAGGTCAGCAAAGTCTTC       | 2-INS_qPCR_Right   | GGAAGGAAACCCAGAAGGGG       |
| VEGFR2 (KDR):f1  | TAAACAGCAGCGGTGTGCCA       | Pdx1_RT-PCR_Left   | ACACGCACGCATGGAAAGGACA     |
| VEGFR2 (KDR):r1  | CAGTCCACGTGGCCATCCATT      | Pdx1_RT-PCR_Right  | GCGGGCGCGAGATGTATTTGTT     |
| FGFR2 F1         | GGCCCATGAGCTCCCTGTTT       | notch1a-qPCR-left  | CATCACCCCTCCAGCAGTCT       |
| FGFR2 R1         | ACGGTCGGTCACTCACTGGA       | notch1a-qPCR-right | CTGAAGAGCTCCACCCATGT       |

**Table S3. qPCR primers**
